# Supplementary material for: Flash Flood Events along the West Mediterranean Coasts: Inundations of Urbanized Areas Conditioned by Anthropic Impacts
Source: MDPI journal article supplement (doi:10.3390/land10060620), 2021-06-09
Supplement: s1 [file s1]

Archive with 1 entries (1 files):
- land-1234463-supplementary.pdf
