# Supplementary material for: Flash Flood Events along the West Mediterranean Coasts: Inundations of Urbanized Areas Conditioned by Anthropic Impacts
Source: MDPI journal article supplement (doi:10.3390/land10060620), 2021-06-09
Supplement: s1 [file s1 › land-1234463-supplementary.pdf]

## ANNEX 1

**Table S1.** Land use in the studied catchments.

| Land cover                                      | GE   | LI   | OL   |
|-------------------------------------------------|------|------|------|
| Urban fabric                                    | 15.4 | 11.6 | 12.3 |
| Industrial, comercial and transport units       | 8.9  | 8.8  | 0.6  |
| Mine, Dump and constructions sites              | 8.2  | 0.0  |      |
| Artificial non-agricultural vegetated areas     |      | 1.1  | 0.4  |
| Arable land                                     |      | 9.2  | 44.4 |
| Pastures                                        |      | 0.5  |      |
| Heterogeneous agricultural areas                | 7.0  | 18.8 | 19.5 |
| Forests                                         | 45.4 | 45.7 | 4.0  |
| Shrub and/or herbaceous vegetation associations | 10.1 | 4.3  | 18.7 |
| Open spaces with little or no vegetation        | 5.1  |      |      |

**Table S2.** Dates of post-World War II flood events in the three studied cities.

| Genova Sestri Ponente                                             | Olbia                                                                                                    | Livorno                                                                                                  |
|-------------------------------------------------------------------|----------------------------------------------------------------------------------------------------------|----------------------------------------------------------------------------------------------------------|
| 1945, 1951, 1970, 1977, 1991,<br>1992, 1993, 1994, 2010 and 2014. | 1946, 1951, 1958, 1964, 1972, 1979,<br>1983, 1989, 1992, 1995, 1996, 1996,<br>2008, 2010, 2013 and 2015. | 1946, 1952, 1961, 1963, 1965, 1966,<br>1971, 1973, 1974, 1984, 1990, 1991,<br>1993, 2004, 2009 and 2017. |
